# Supplementary material for: Preparation of a cost-effective Ni–Ag bimetallic catalyst for hydrodehalogenation of aryl halides under mild conditions
Source: Royal Society of Chemistry journal article supplement (doi:10.1039/d2nj01532c), 2022-01-01

## Supporting Information

Hydrodehalogenation of aryl halides catalyzed by cost-effective  
bimetallic nanoparticles under mild conditions

Jiazhu Deng, Teng Xue,\* Haihong Wu,\* and Peng Wu

Shanghai Key Laboratory of Green Chemistry and Chemical Processes, School of  
Chemistry and Molecular Engineering, East China Normal University, Shanghai  
200062, China

E-mail: hhwu@chem.ecnu.edu.cn

## 1. Catalyst Characterization and optimization experiments:

**Table S1 elemental composition of the catalysts**

| <b>Sample</b>  | <b>Ni (wt%)</b> | <b>Ag (wt%)</b> | <b>Molar ratio</b> |
|----------------|-----------------|-----------------|--------------------|
| Fresh          | 90.2            | 7.8             | 95.5:4.5           |
| After 5 cycles | 81.5            | 7.5             | 95.2:4.8           |

**Table S2 Screening of the catalysts**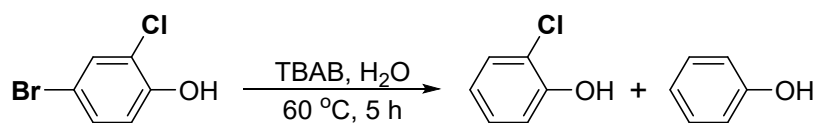

| Entry | T/°C                                 | Yield/% |        |
|-------|--------------------------------------|---------|--------|
|       |                                      | 2-CP    | Phenol |
| 1     | Fe                                   | 6       | -      |
| 2     | Cu                                   | 1       | -      |
| 3     | Co                                   | 28      | 12     |
| 4     | Ni                                   | 33      | 65     |
| 5     | Ni <sub>90</sub> Fe <sub>10</sub>    | 51      | 36     |
| 6     | Ni <sub>90</sub> Co <sub>10</sub>    | 44      | 49     |
| 7     | Ni <sub>90</sub> Cu <sub>10</sub>    | 53      | 42     |
| 8     | Ni <sub>97.5</sub> Ag <sub>2.5</sub> | 19      | 80     |
| 9     | Ni <sub>95</sub> Ag <sub>5</sub>     | -       | 99     |
| 10    | Ni <sub>90</sub> Ag <sub>10</sub>    | 5       | 94     |
| 11    | Ni <sub>80</sub> Ag <sub>20</sub>    | 19      | 76     |
| 12    | Ag                                   | 57      | 5      |
| 13    | SDBS                                 | -       | -      |

Reaction conditions: 4-bromo-2-chlorophenol (1 mmol), catalyst (50 mg), H<sub>2</sub>O (3 mL), TBAB 1 equiv, 60 °C for 5 h. Yield determined by GC.

**Table S3 Products of Substrate 31-33 without adding K<sub>3</sub>PO<sub>4</sub>**

| Substrate                                                                                      | Product 1                                                                                | Product 2                                                                                  |
|------------------------------------------------------------------------------------------------|------------------------------------------------------------------------------------------|--------------------------------------------------------------------------------------------|
| 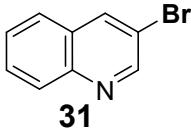<br><b>31</b> | <br>60% | <br>29% |
| <br><b>32</b> | <br>63% | <br>14% |
| <br><b>33</b> | <br>52% | <br>36% |

Reaction conditions: Substrate 31-33 (1 mmol), Ni<sub>95</sub>Ag<sub>5</sub> (50 mg), H<sub>2</sub>O (3 mL), TBAB 1 equiv, 60 °C for 10-12 h. Yield determined by GC.

**Figure S1  $^1\text{H-NMR}$  of the product phenol use  $\text{H}_2\text{O}$  and  $\text{D}_2\text{O}$  as solvent**

$\text{H}_2\text{O}$

$\text{D}_2\text{O}$

## 2. Characterization data of products:

### *N,N-Dimethylaniline*

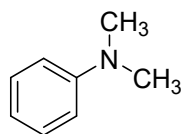

$^1\text{H-NMR}$  (500 MHz,  $\text{CD}_3\text{CN}$ ):  $\delta$  7.26-7.21 (m, 2H), 6.80-6.77 (d, 2H), 6.72-6.68 (t, 1H), 2.93 (s, 6H);  $^{13}\text{C-NMR}$  (125 MHz,  $\text{CD}_3\text{CN}$ ):  $\delta$  151.0, 128.9, 116.3, 112.5, 39.8.

### *Benzamide*

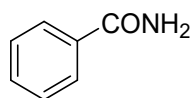

$^1\text{H-NMR}$  (500 MHz,  $\text{CDCl}_3$ ):  $\delta$  7.86 (d,  $J = 8.1$  Hz, 2H), 7.58 (t,  $J = 7.5$  Hz, 1H), 7.49 (t,  $J = 7.4$  Hz, 2H), 6.25 (br, 2H);  $^{13}\text{C-NMR}$  (125 MHz,  $\text{CDCl}_3$ ):  $\delta$  169.7, 130.0, 132.3, 128.7, 127.5.

### *Benzoic acid*

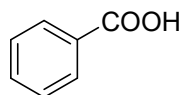

$^1\text{H-NMR}$  (500 MHz,  $\text{CDCl}_3$ ):  $\delta$  8.18 (d,  $J = 7.5$  Hz, 2H), 7.67 (t,  $J = 7.4$  Hz, 1H), 7.54 (t,  $J = 7.6$  Hz, 2H);  $^{13}\text{C-NMR}$  (125 MHz,  $\text{CDCl}_3$ ):  $\delta$  172.4, 133.9, 130.3, 129.3, 128.5.

### *Naphthalene*

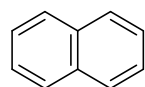

$^1\text{H-NMR}$  (500 MHz,  $\text{CDCl}_3$ ):  $\delta$  7.92-7.89 (m, 4H), 7.55-7.52 (m, 4H);  $^{13}\text{C-NMR}$  (125 MHz,  $\text{CDCl}_3$ ):  $\delta$  133.5, 127.9, 125.7.

### *2-Methoxynaphthalene*

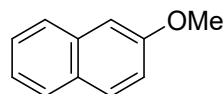

$^1\text{H-NMR}$  (500 MHz,  $\text{CDCl}_3$ ):  $\delta$  7.84-7.79 (m, 3H), 7.51 (ddd,  $J = 8.2, 6.9, 1.4$  Hz, 1H), 7.39 (ddd,  $J = 8.0, 6.9, 1.2$  Hz, 1H), 7.23-7.20 (m, 2H), 3.98 (s, 3H);  $^{13}\text{C-NMR}$

(125 MHz, CDCl<sub>3</sub>):  $\delta$  157.6, 134.6, 129.4, 129.0, 127.7, 126.8, 126.4, 123.6, 118.8, 105.8, 55.3. The obtained spectroscopic data were in agreement with the reported data for this compound<sup>1</sup>.

### *Biphenyl*

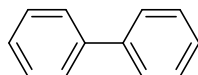

<sup>1</sup>H-NMR (500 MHz, CDCl<sub>3</sub>):  $\delta$  7.67-7.65 (m, 4H), 7.52-7.49 (m, 4H), 7.43-7.39 (m, 2H); <sup>13</sup>C-NMR (125 MHz, CDCl<sub>3</sub>):  $\delta$  141.3, 128.8, 127.3, 127.2.

### *Diphenyl ether*

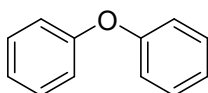

<sup>1</sup>H-NMR (500 MHz, CDCl<sub>3</sub>):  $\delta$  7.39 (t,  $J$  = 8.0 Hz, 4H), 7.16 (t,  $J$  = 7.4 Hz, 2H), 7.07 (t,  $J$  = 7.8 Hz, 4H); <sup>13</sup>C-NMR (125 MHz, CDCl<sub>3</sub>):  $\delta$  157.3, 129.8, 123.3, 118.9.

### *Carbazole*

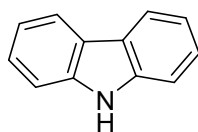

<sup>1</sup>H-NMR (500 MHz, DMSO-*d*<sub>6</sub>):  $\delta$  11.26 (s, 1H), 8.11 (d,  $J$  = 7.6 Hz, 2H), 7.50 (d,  $J$  = 8.1 Hz, 2H), 7.39 (ddd,  $J$  = 8.2, 7.0, 1.2 Hz, 2H), 7.16 (ddd,  $J$  = 7.9, 7.0, 1.1 Hz, 2H); <sup>13</sup>C-NMR (125 MHz, DMSO-*d*<sub>6</sub>):  $\delta$  140.2, 126.0, 122.8, 120.6, 118.9, 111.4. The obtained spectroscopic data were in agreement with the reported data for this compound<sup>2</sup>.

### *Phenoxyacetic acid*

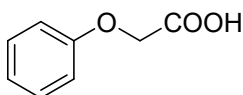

<sup>1</sup>H-NMR (500 MHz, CDCl<sub>3</sub>):  $\delta$  7.36 (t,  $J$  = 8.0 Hz, 2H), 7.07 (t,  $J$  = 7.4 Hz, 1H), 6.98 (d,  $J$  = 8.0 Hz, 2H), 4.73 (s, 2H); <sup>13</sup>C-NMR (125 MHz, CDCl<sub>3</sub>):  $\delta$  172.50, 157.33, 129.75, 122.21, 114.68, 64.84. The obtained spectroscopic data were in agreement with the reported data for this compound<sup>3</sup>.

## 2-Phenoxyphenol

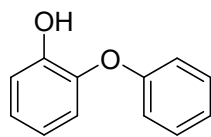

<sup>1</sup>H-NMR (500 MHz, CDCl<sub>3</sub>): δ 7.39 (t, 8.0 Hz, 2H), 7.17 (t, 7.4 Hz, 1H), 7.10-7.06 (m, 4H), 6.94-6.87 (m, 2H), 5.61 (s, 1H); <sup>13</sup>C-NMR (125 MHz, CDCl<sub>3</sub>): δ 156.8, 147.5, 143.5, 129.9, 124.8, 123.6, 120.7, 118.9, 118.0, 116.2. The obtained spectroscopic data were in agreement with the reported data for this compound<sup>4</sup>.

### Reference:

1. D. Y. Ong, C. Tejo, K. Xu, H. Hirao and S. Chiba, *Angew. Chem. Int. Ed.*, 2017, **56**, 1840-1844.
2. T. V. Nykaza, A. Ramirez, T. S. Harrison, M. R. Luzung and A. T. Radosevich, *J. Am. Chem. Soc.*, 2018, **140**, 3103-3113.
3. M. Rafiee, M. Alherech, S. D. Karlen and S. S. Stahl, *J Am Chem Soc*, 2019, **141**, 15266-15276.
4. W. Li, G. L. Gao, Y. Gao, C. Yang and W. J. Xia, *Chem. Commun.*, 2017, **53**, 5291.

### Spectra of N, N-Dimethylaniline

<sup>1</sup>H-NMR



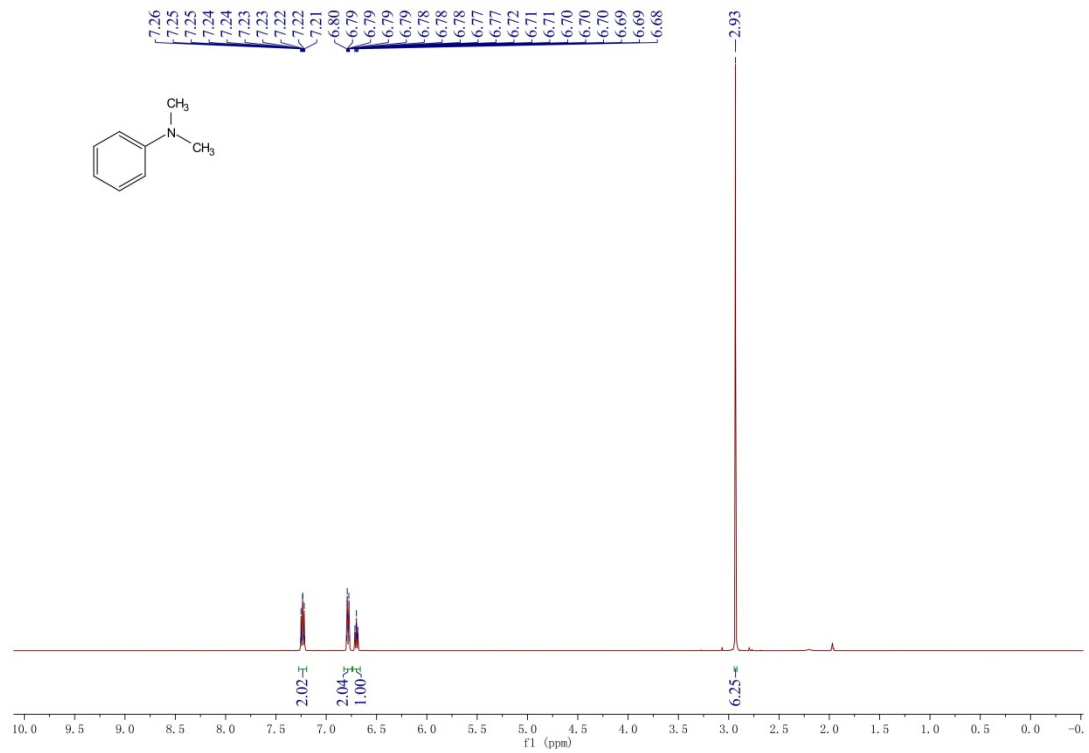

<sup>13</sup>C-NMR

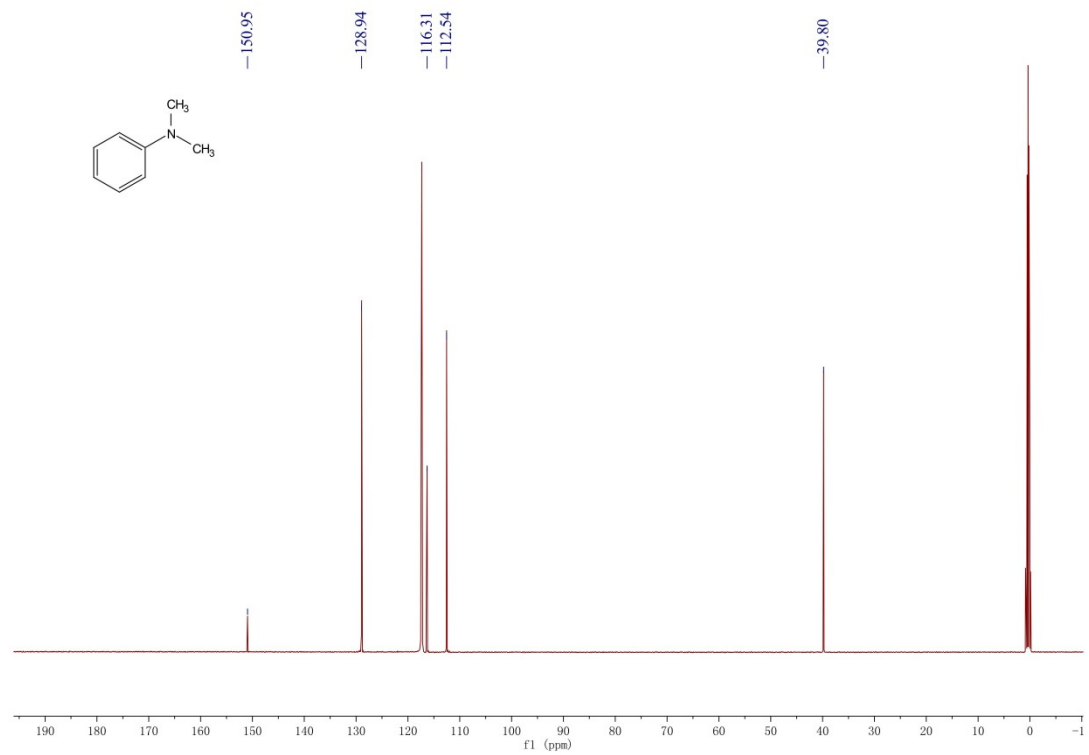

# Spectra of Benzamide

## <sup>1</sup>H-NMR

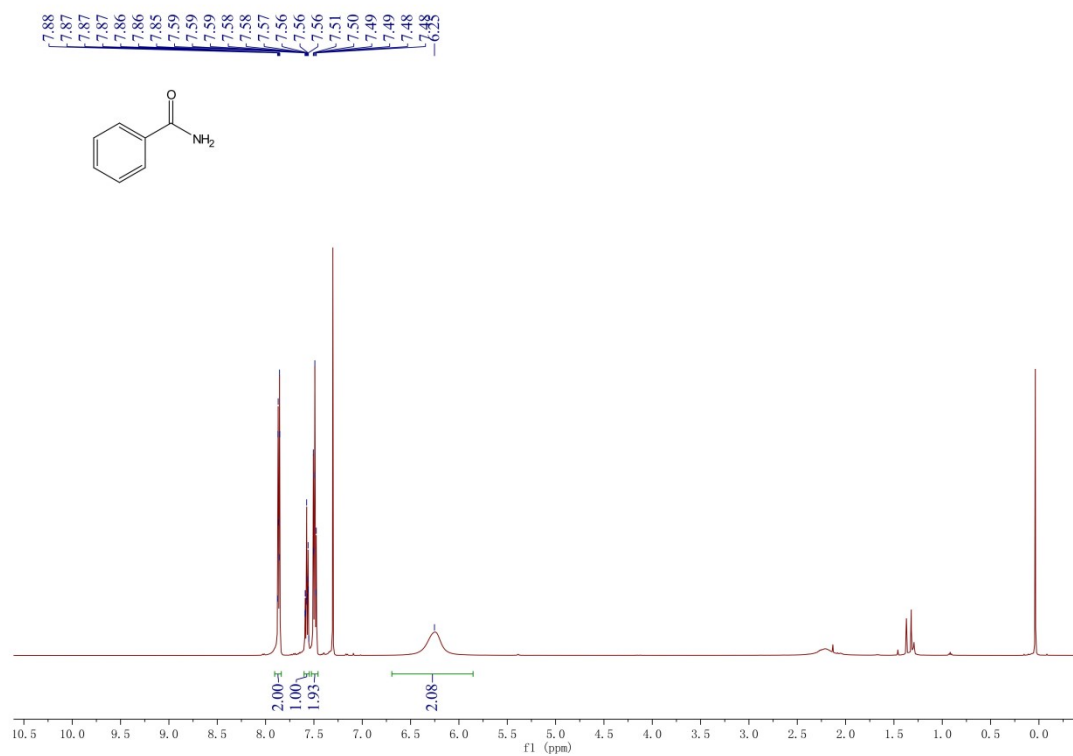

## <sup>13</sup>C-NMR

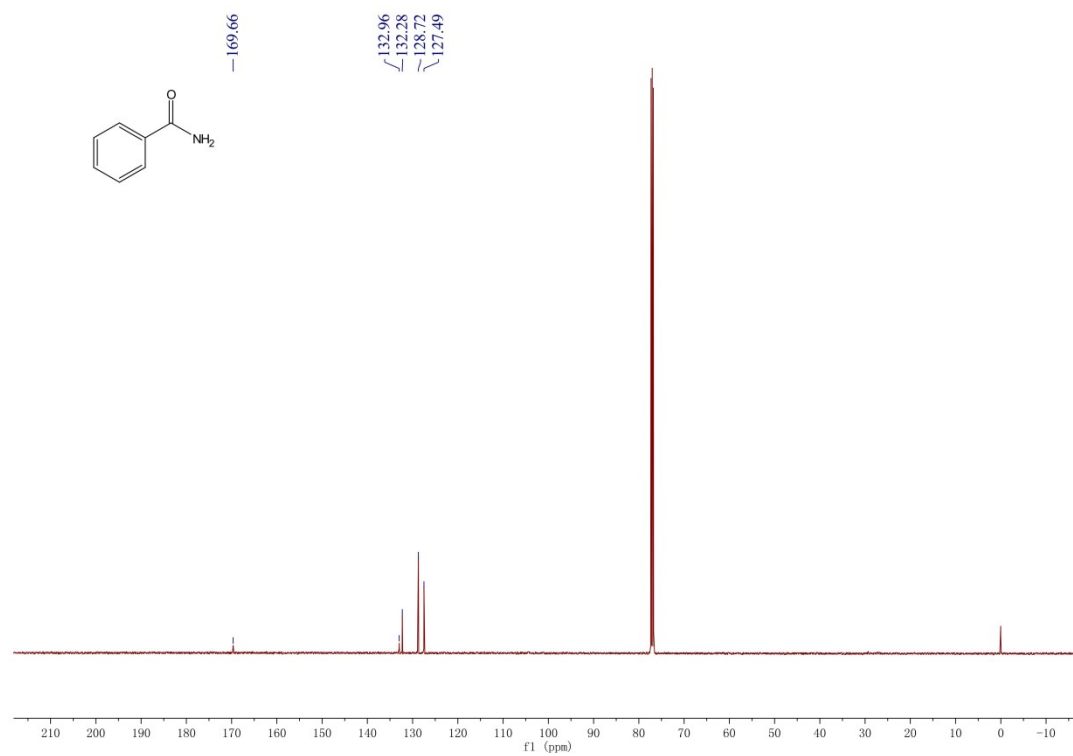

# Spectra of Benzoic acid

## <sup>1</sup>H-NMR

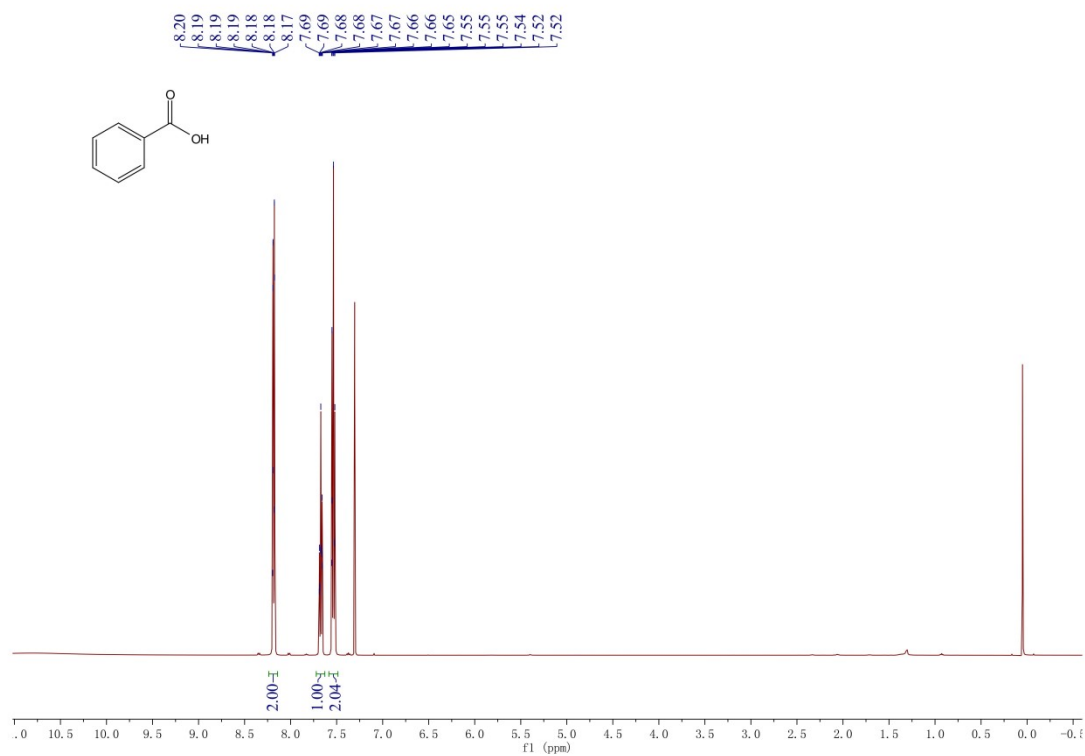

## <sup>13</sup>C-NMR

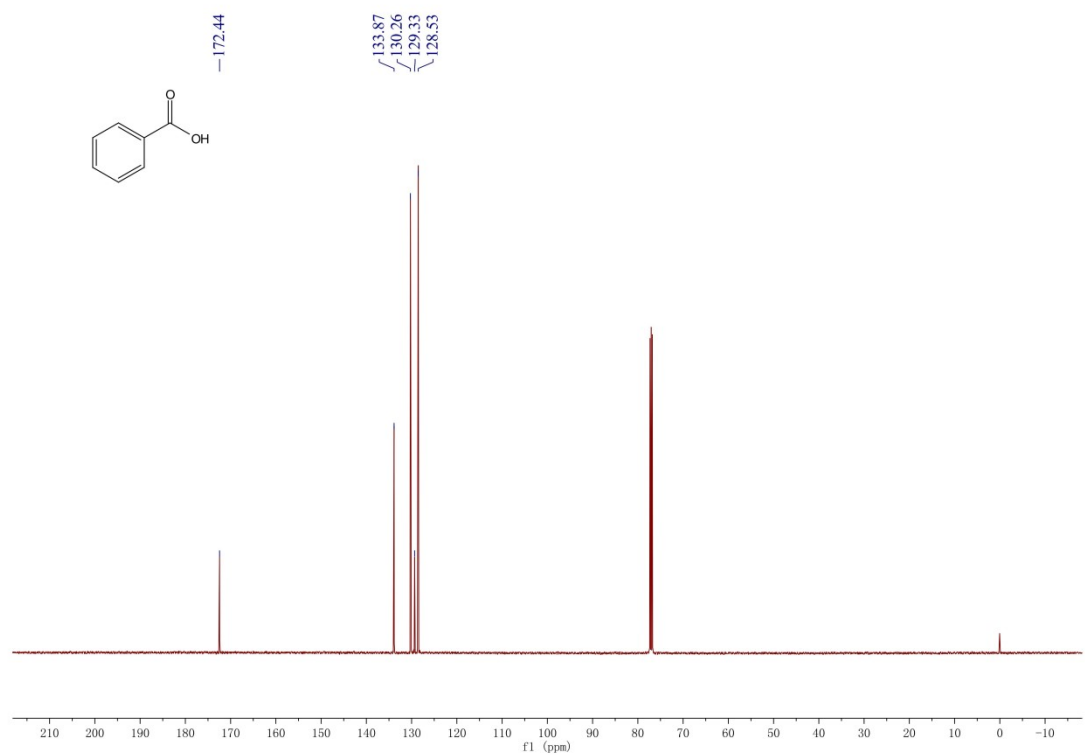

# Spectra of Naphthalene

## $^1\text{H-NMR}$

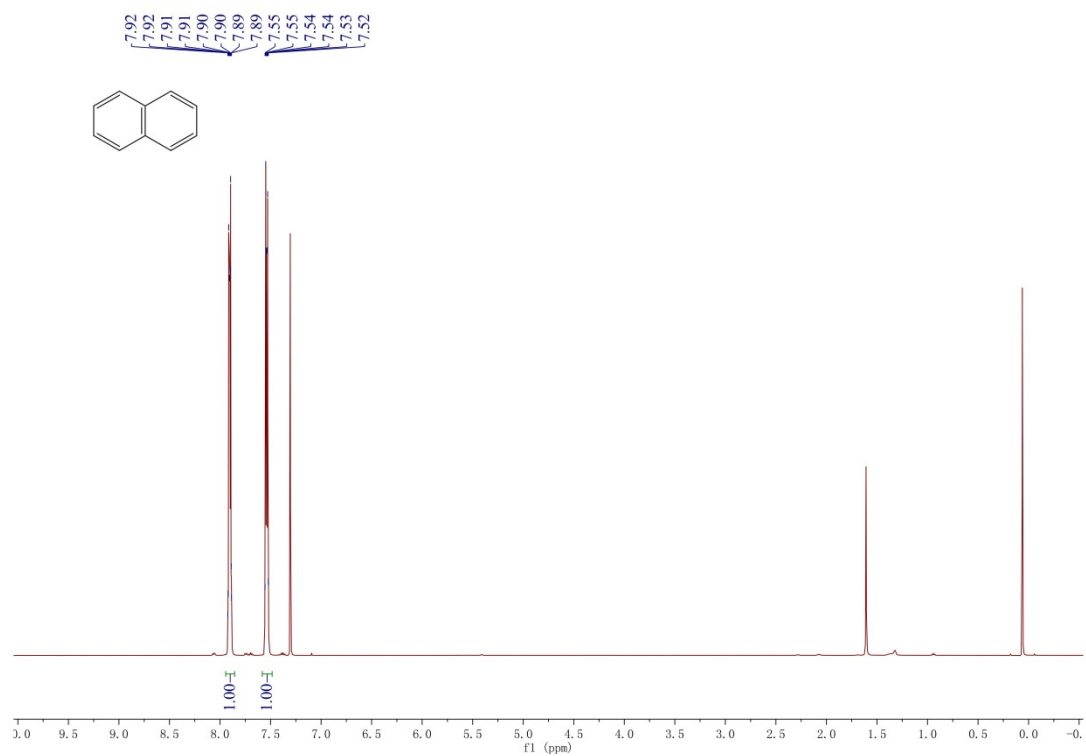

## $^{13}\text{C-NMR}$

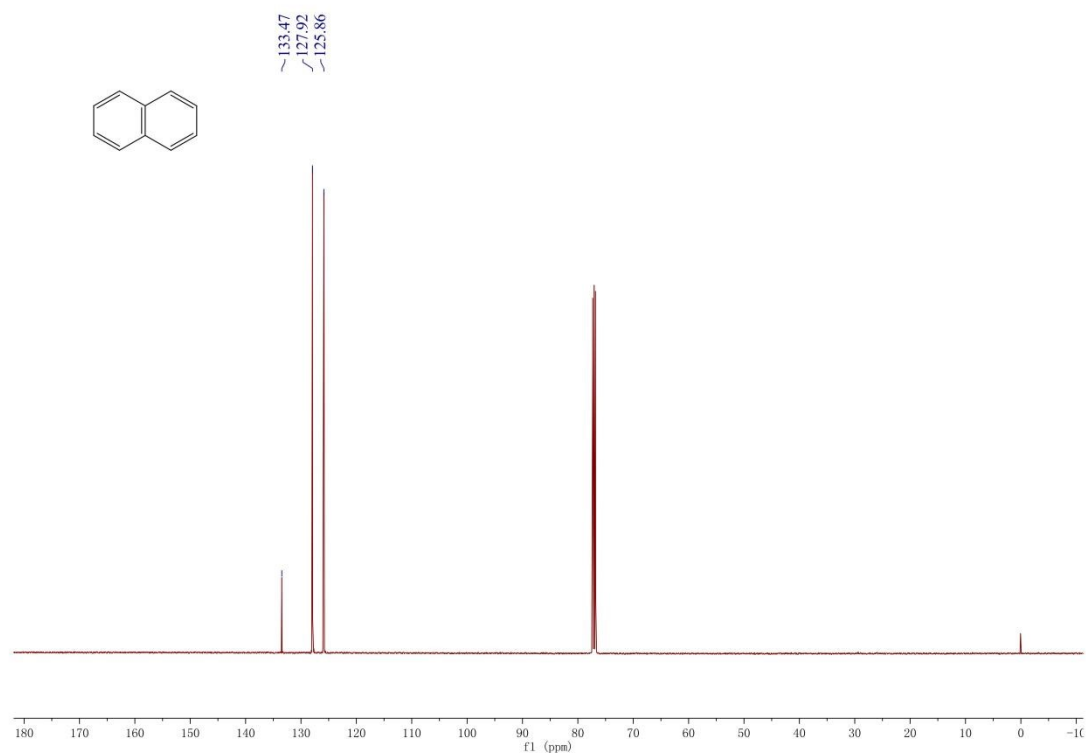

# Spectra of 2-Methoxynaphthalene

## $^1\text{H-NMR}$

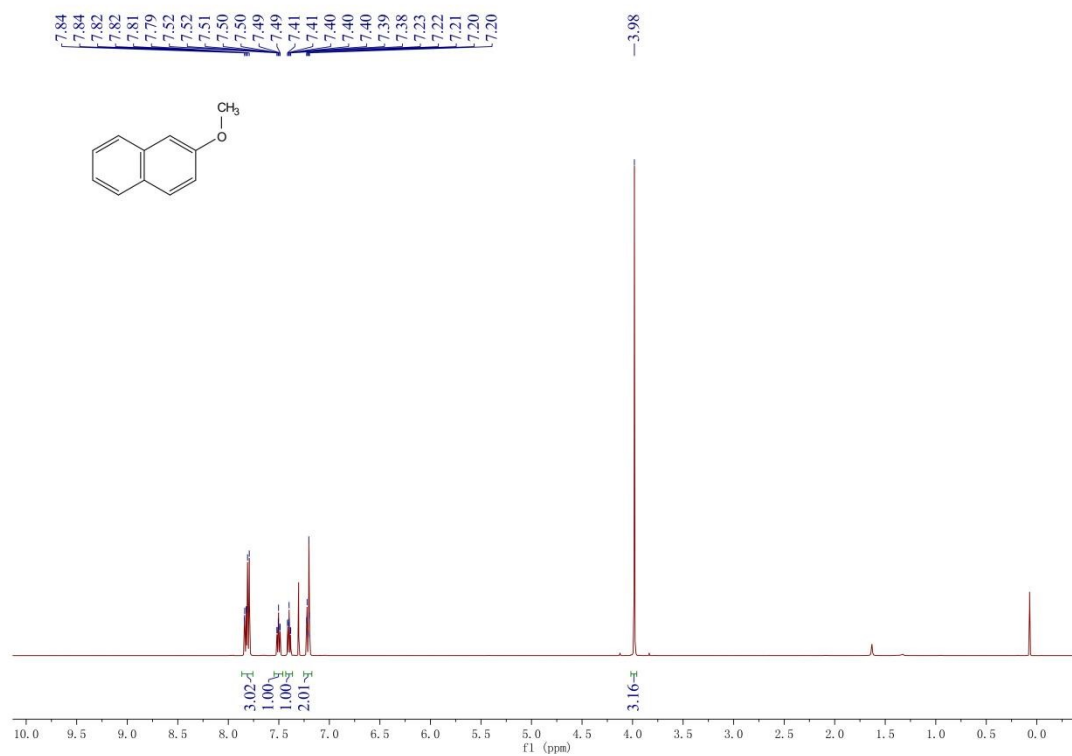

## $^{13}\text{C-NMR}$

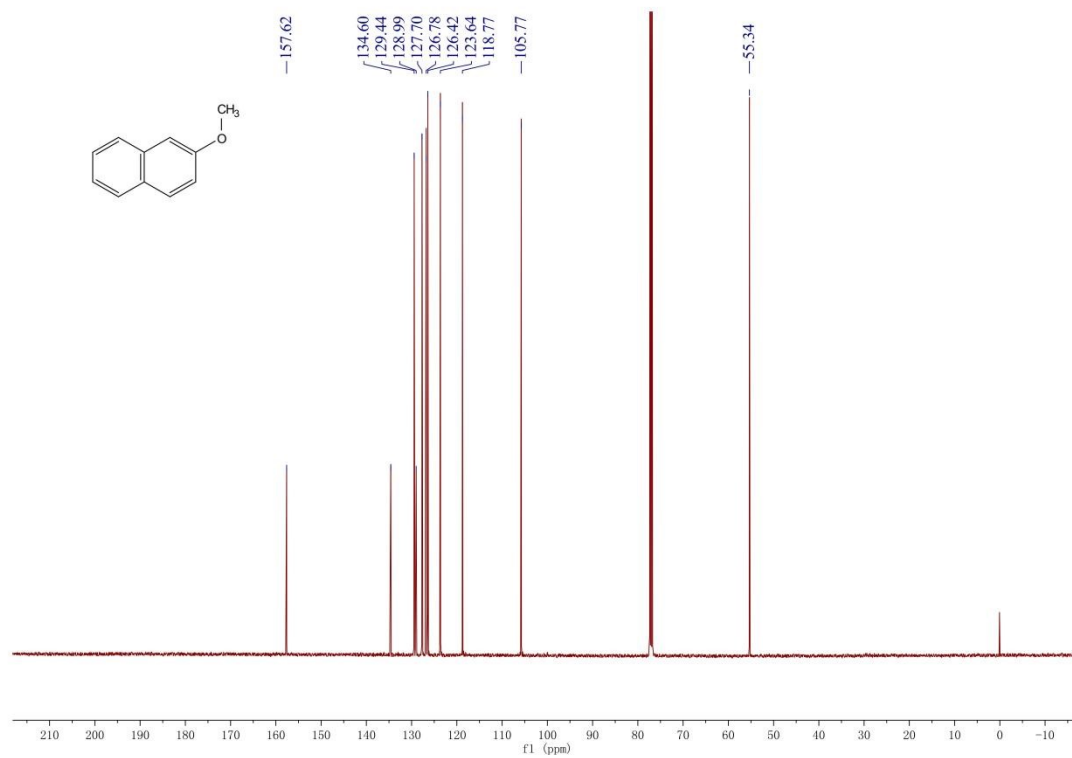

# Spectra of Biphenyl

## <sup>1</sup>H-NMR

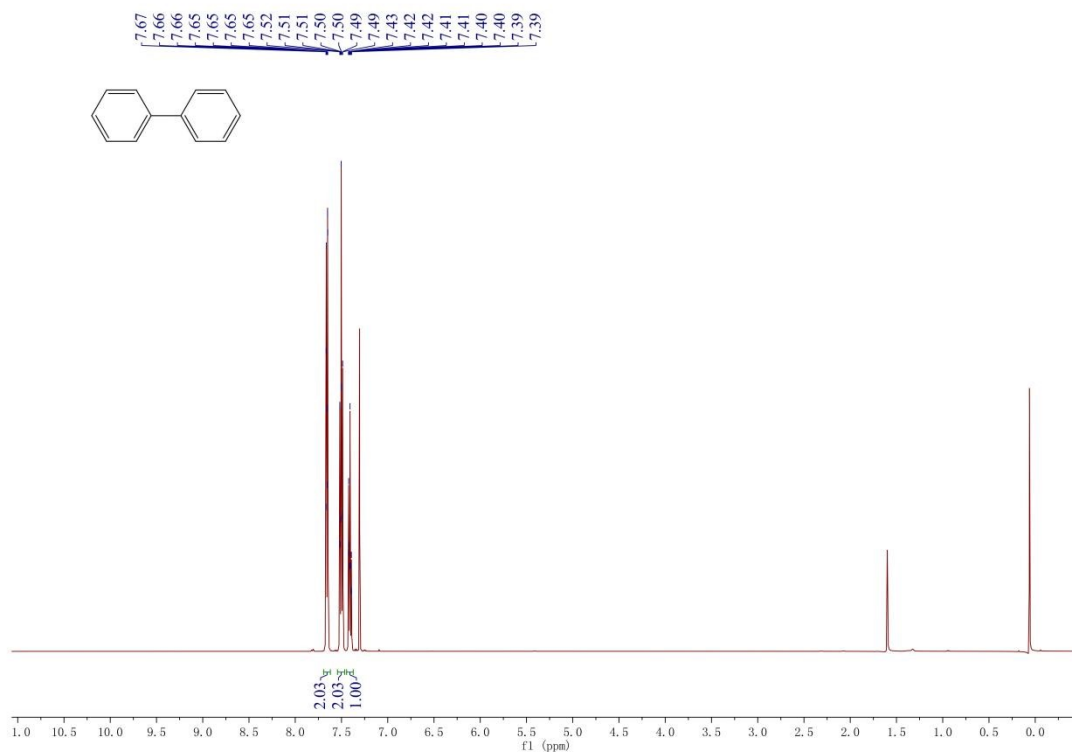

## <sup>13</sup>C-NMR

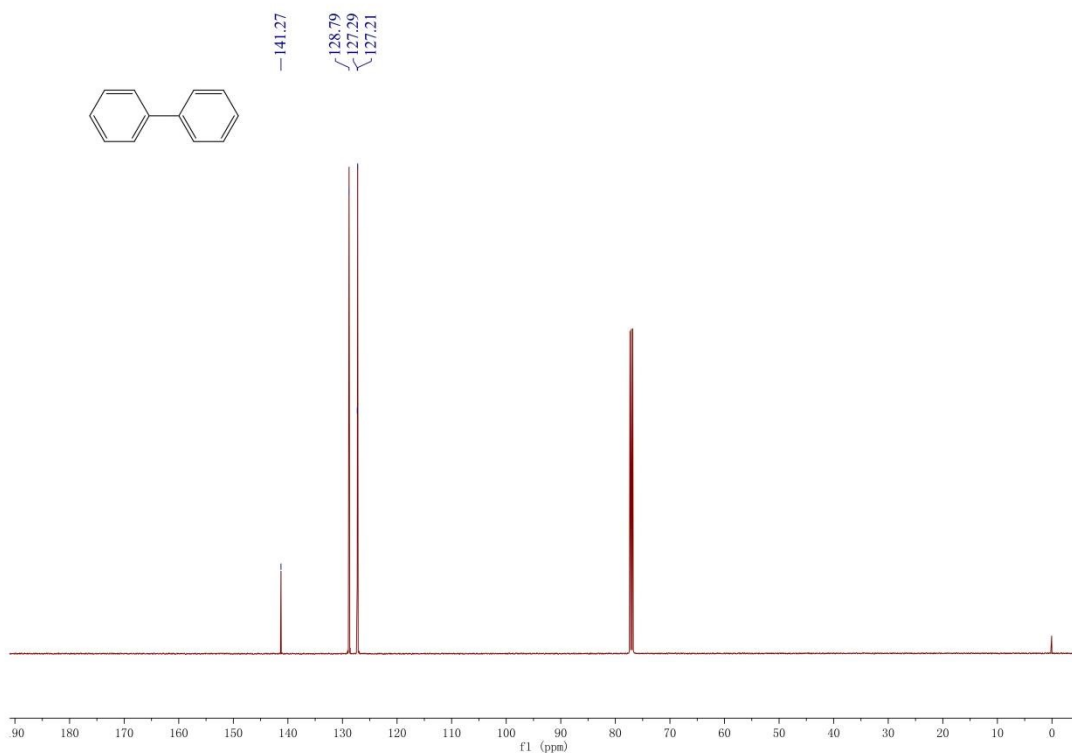

# Spectra of Diphenyl ether

## <sup>1</sup>H-NMR

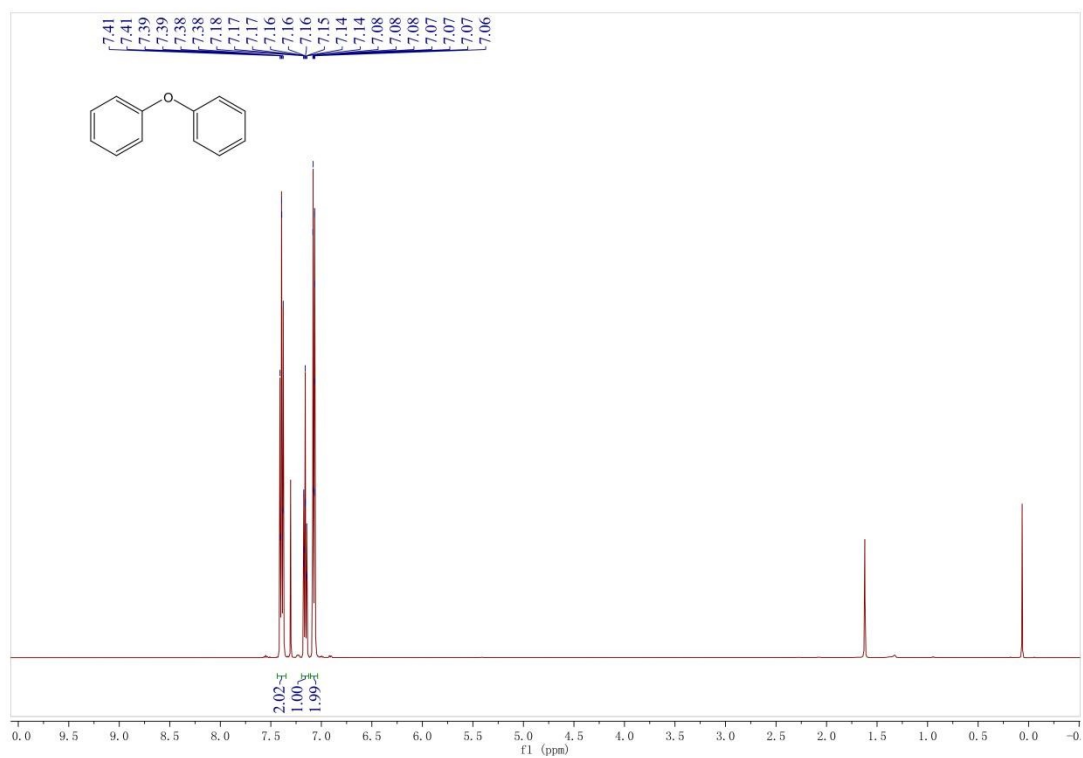

## <sup>13</sup>C-NMR

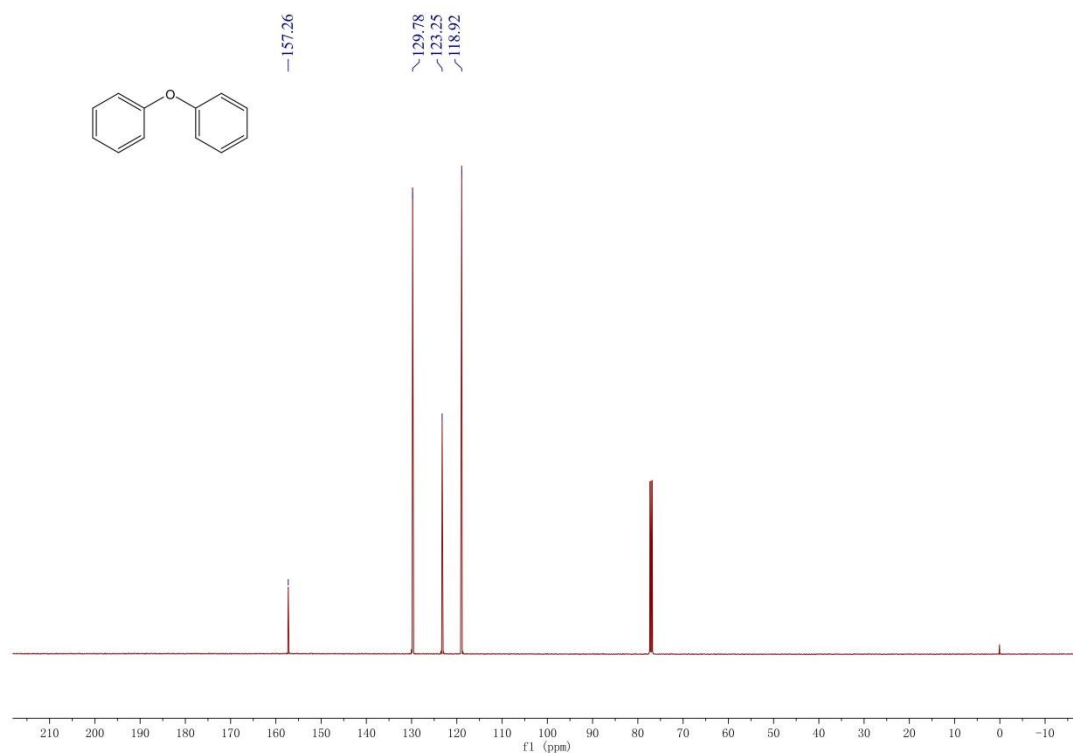

# Spectra of Carbazole

## <sup>1</sup>H-NMR

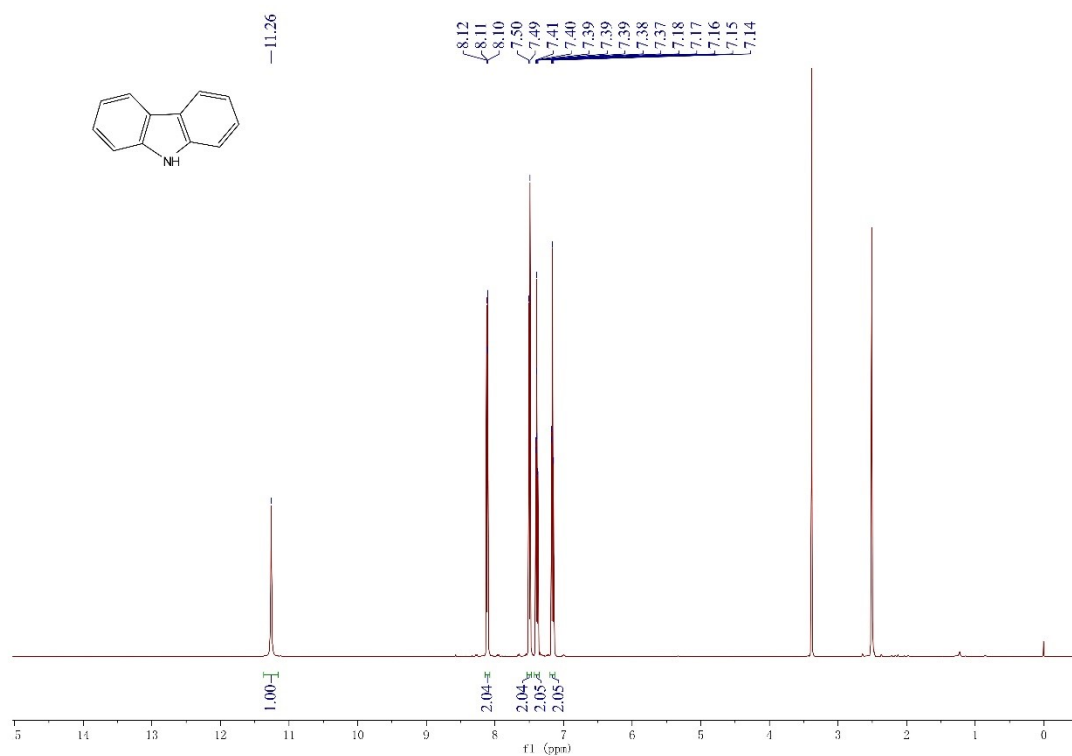

## <sup>13</sup>C-NMR

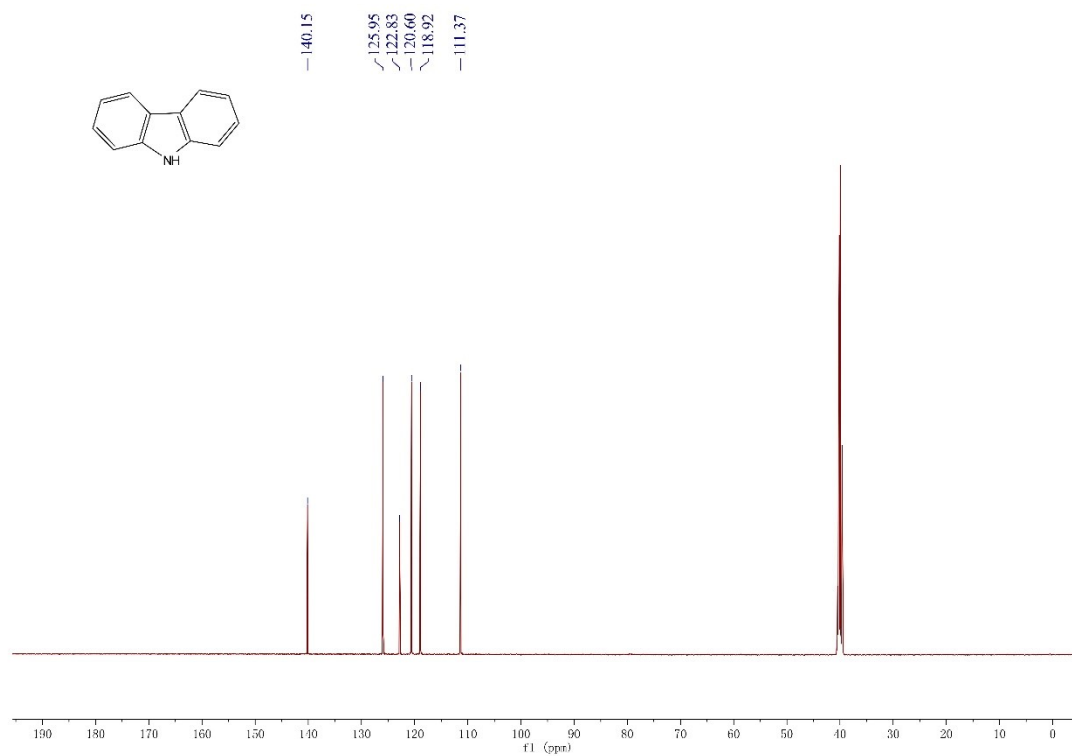



# Spectra of Phenoxyacetic acid

## $^1\text{H-NMR}$

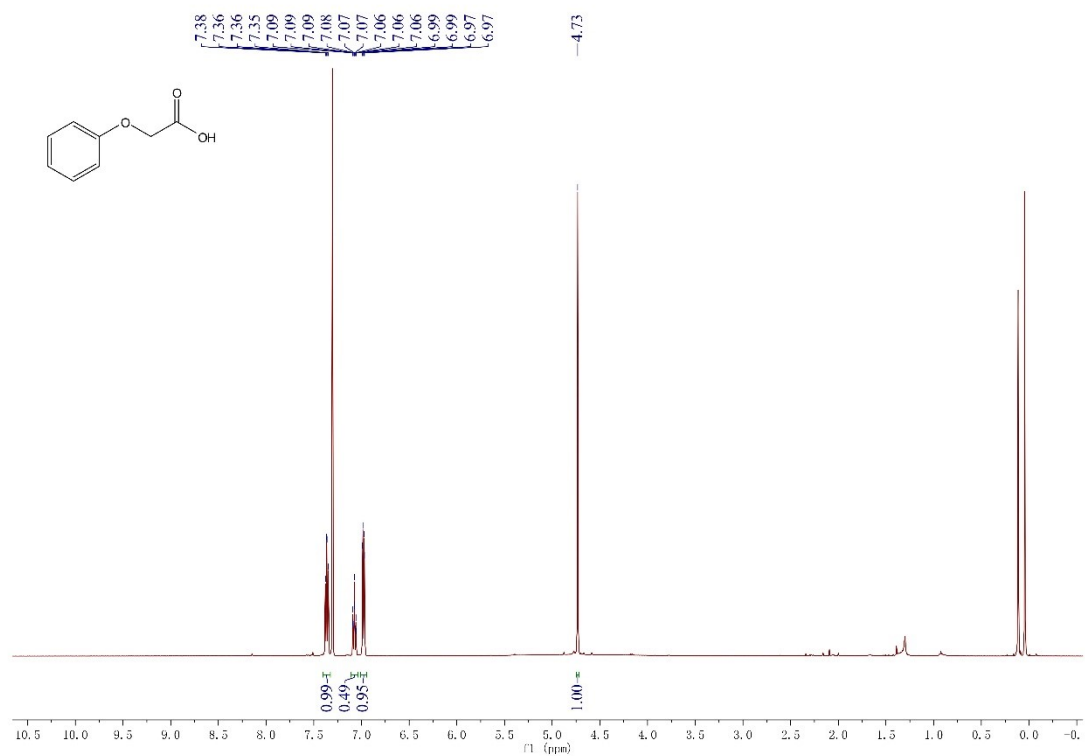

## $^{13}\text{C-NMR}$

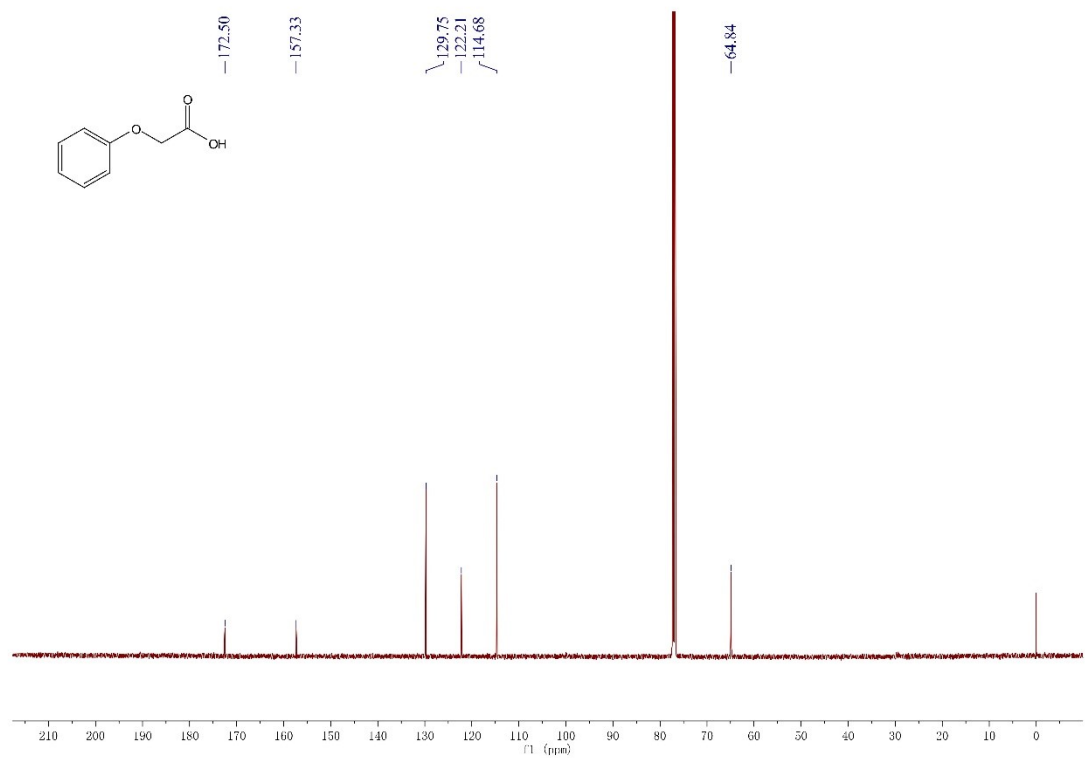

# Spectra of 2-Phenoxyphenol

## <sup>1</sup>H-NMR

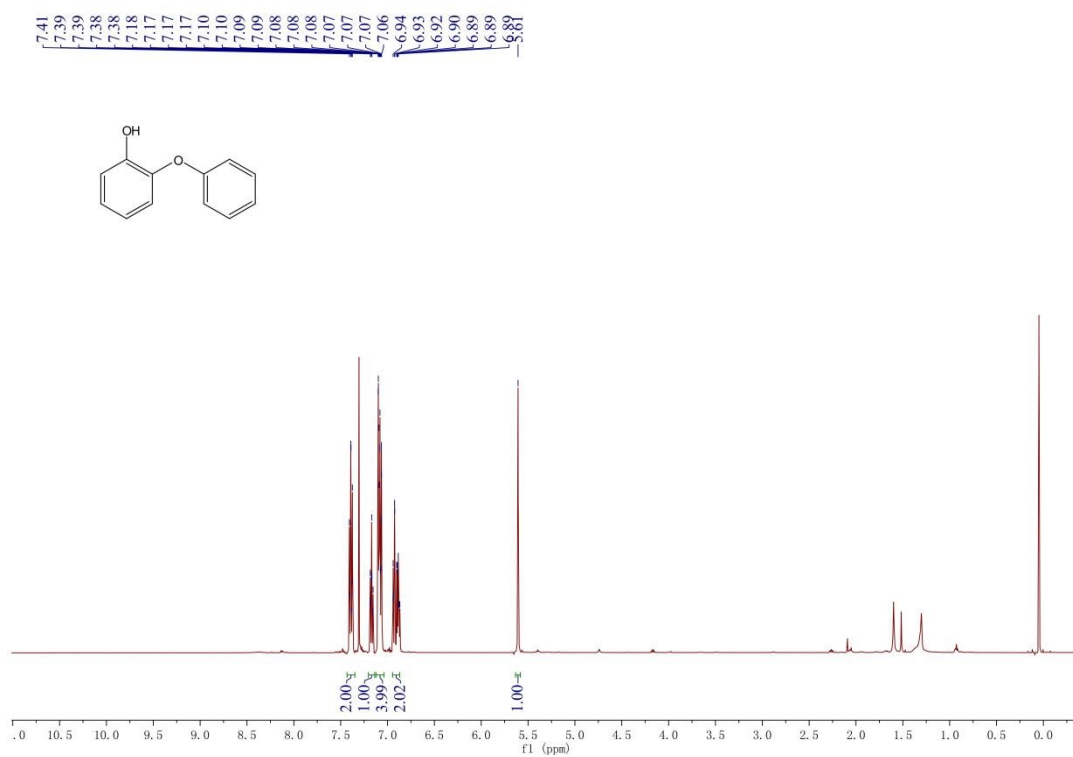

## <sup>13</sup>C-NMR

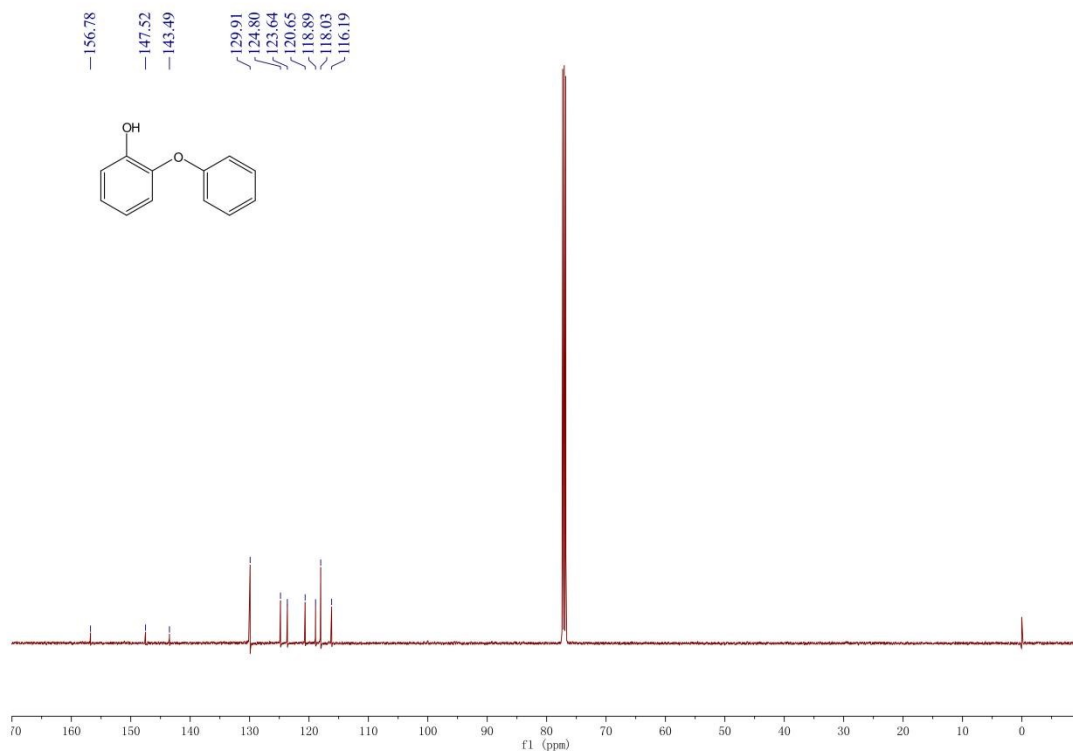

Supplement: d2nj01532c1.pdf [file d2nj01532c1.pdf]
